# Supplementary material for: Jugular vein distensibility predicts fluid responsiveness in septic patients
Source: Springer Nature journal article supplement (doi:10.1186/s13054-014-0647-1), 2014-12-04
Supplement: MOESM2 [file 9779906]

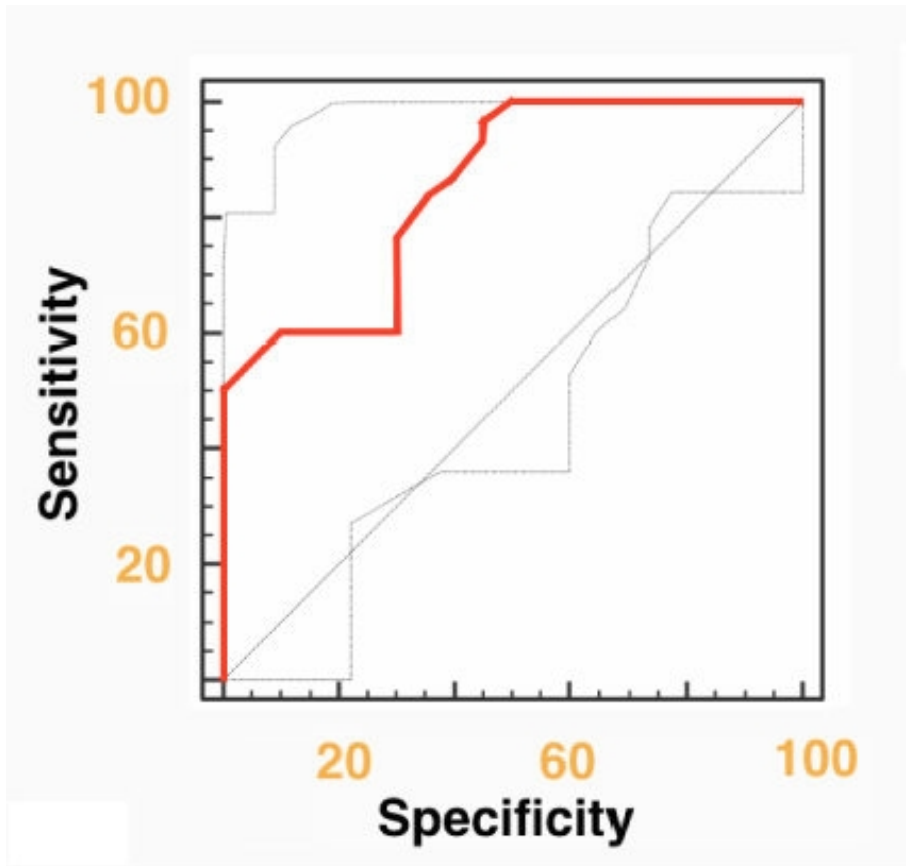

Best Criterion values and coordinates of the ROC curve for PPV

| Criterion | Sensitivity | 95% CI       | Specificity | 95% CI      |
|-----------|-------------|--------------|-------------|-------------|
| >12       | 100,00      | 88,4 - 100,0 | 50,00       | 27,2 - 72,8 |
| >12,5 *   | 96,67       | 82,8 - 99,9  | 55,00       | 31,5 - 76,9 |
| >13,4     | 93,33       | 77,9 - 99,2  | 55,00       | 31,5 - 76,9 |
| >14       | 86,67       | 69,3 - 96,2  | 60,00       | 36,1 - 80,9 |
| >15       | 83,33       | 65,3 - 94,4  | 65,00       | 40,8 - 84,6 |
| >16       | 76,67       | 57,7 - 90,1  | 70,00       | 45,7 - 88,1 |
| >19       | 60,00       | 40,6 - 77,3  | 70,00       | 45,7 - 88,1 |
