# Supplementary material for: Jugular vein distensibility predicts fluid responsiveness in septic patients
Source: Springer Nature journal article supplement (doi:10.1186/s13054-014-0647-1), 2014-12-04
Supplement: MOESM3 [file 9779906]

Table 2. Best values of Sensitivity and Specificity determined by the combination of Internal Jugular vein Distensibility and Pulse Pressure Variation in predicting fluid responsiveness

| Internal Jugular Vein Distensibility% | Pulse pressure Variation% | Sensitivity | 1-Specificity |
|---------------------------------------|---------------------------|-------------|---------------|
| >16.4                                 | >12.5                     | 0.8         | 0             |
| >16.4                                 | >12.5                     | 0.8         | 0             |
| >16.4                                 | >11                       | 0.8         | 0             |
| >16.4                                 | >12                       | 0.8         | 0             |
| >13.5                                 | >13.4                     | 0.866667    | 0.05          |
| >9.6                                  | >12.5                     | 0.966667    | 0.15          |
| >9.6                                  | >12.5                     | 0.966667    | 0.15          |
| >14                                   | >12.5                     | 0.866667    | 0.05          |
| >14                                   | >12.5                     | 0.866667    | 0.05          |
| >14                                   | >11                       | 0.866667    | 0.05          |
| >14                                   | >12                       | 0.866667    | 0.05          |
| >14                                   | >12.5                     | 0.866667    | 0.05          |
| >14                                   | >12.5                     | 0.866667    | 0.05          |
| >15.5                                 | >13.4                     | 0.833333    | 0             |
| >9.7                                  | >12                       | 1           | 0.15          |
| >9.9                                  | >12                       | 1           | 0.05          |
